# Supplementary material
Source: PubMed Central journal article supplement (PMC6419754)
Supplement: NIHMS1522461-supplement-1.pdf [file NIHMS1522461-supplement-1.pdf]

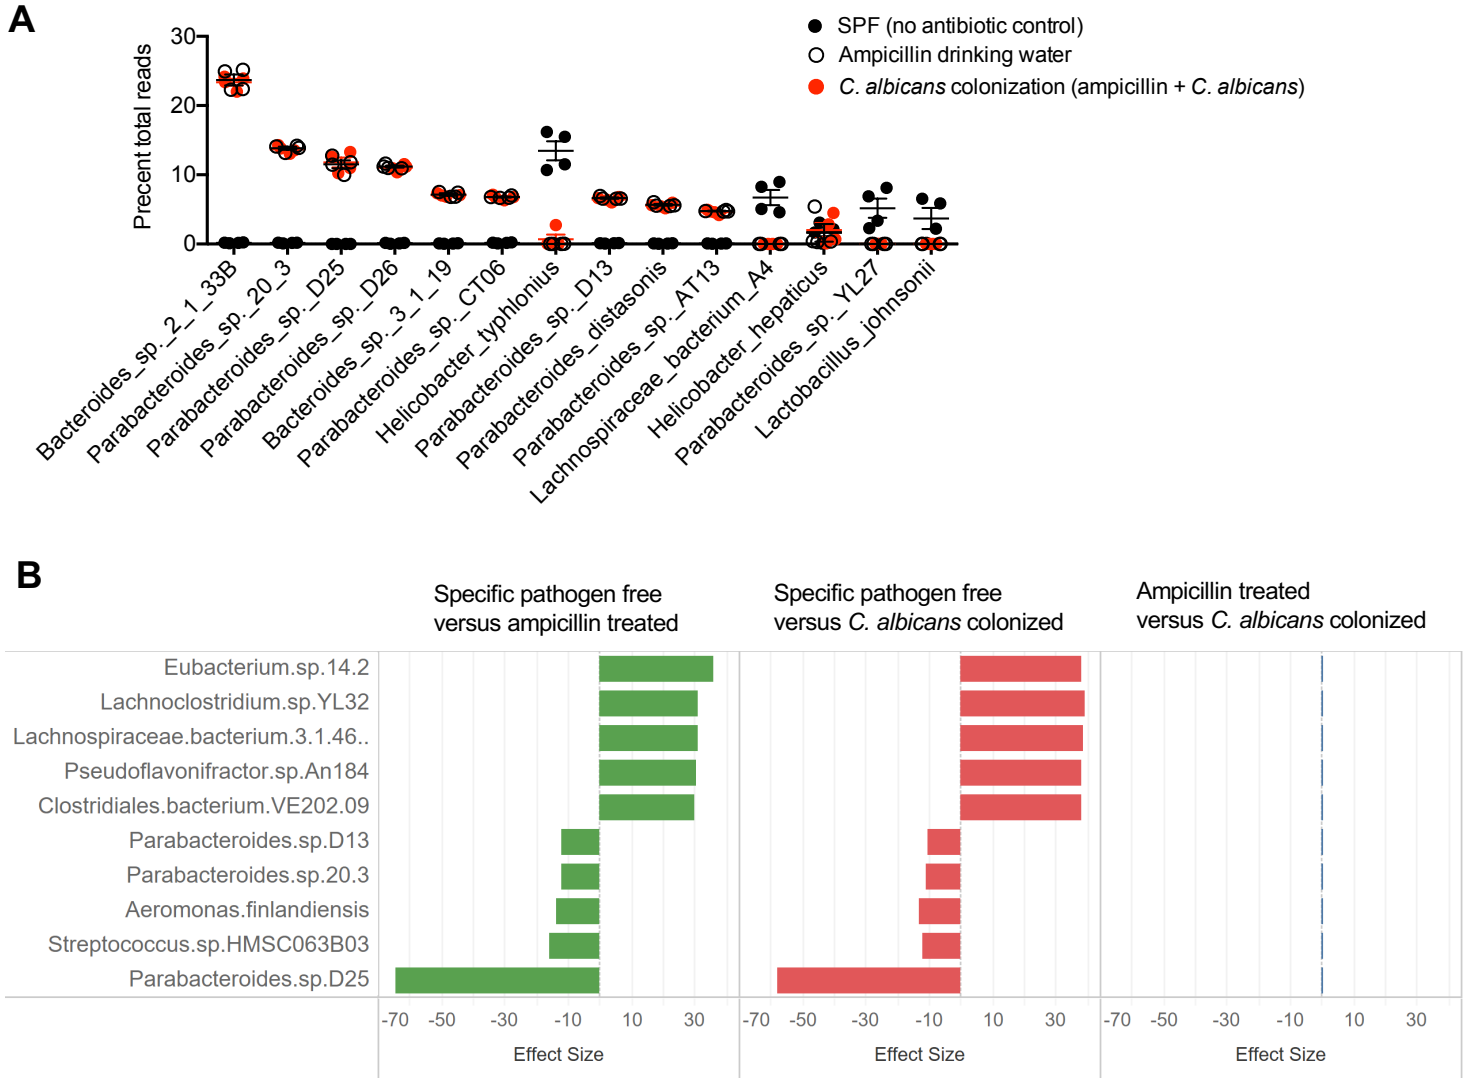

**Figure S1. Similar composition and abundance of fecal bacterial species in ampicillin treated mice regardless of *C. albicans* intestinal colonization, Related to Figure 1**

(A) Percent total reads for the most abundant bacterial species in the feces for each group of mice after drinking water ampicillin supplementation (12 days) with or without oral *C. albicans* inoculation (2 days after initiating ampicillin drinking water supplementation).

(B) Linear discriminant analysis comparing differential abundance of top 10 bacterial species with the most differences between specific pathogen-free control versus ampicillin treated (green), specific pathogen-free control versus *C. albicans* colonized (red), and ampicillin treated compared with *C. albicans* colonized (blue).

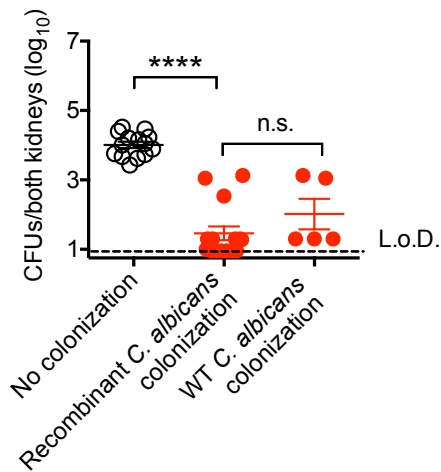

**Figure S2. Protection against *C. albicans* invasive infection does not reflect enhanced immunogenicity of recombinant *C. albicans*, Related to Figure 2**

Recoverable CFUs from the kidneys five days after intravenous infection ( $5 \times 10^4$  CFUs recombinant *C. albicans*) for mice colonized with either recombinant *C. albicans* (2W1S-*Candida*), non-recombinant parental WT *C. albicans* (strain SC5314), or no colonization control mice maintained on ampicillin supplemented drinking water.

\*\*\*\*  $p < 0.0001$ ; n.s., not significant; Bar, mean  $\pm$  SEM. L.o.D., limit of detection.

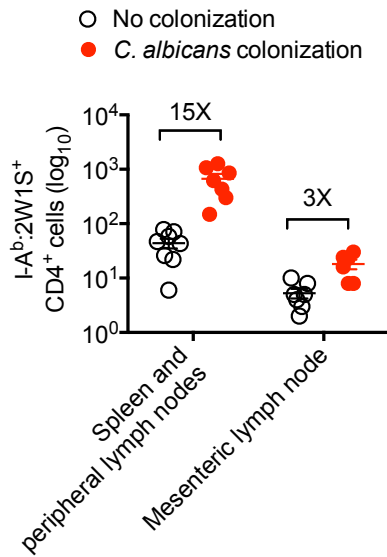

**Figure S3. Systemic expansion of CD4<sup>+</sup> T cells with surrogate *C. albicans* commensal specificity, Related to Figure 3**

Total number of I-A<sup>b</sup>:2W1S tetramer positive CD4<sup>+</sup> T cells from spleen plus peripheral lymph nodes compared with the mesenteric lymph node of mice colonized with recombinant *C. albicans* compared with no colonization control mice.

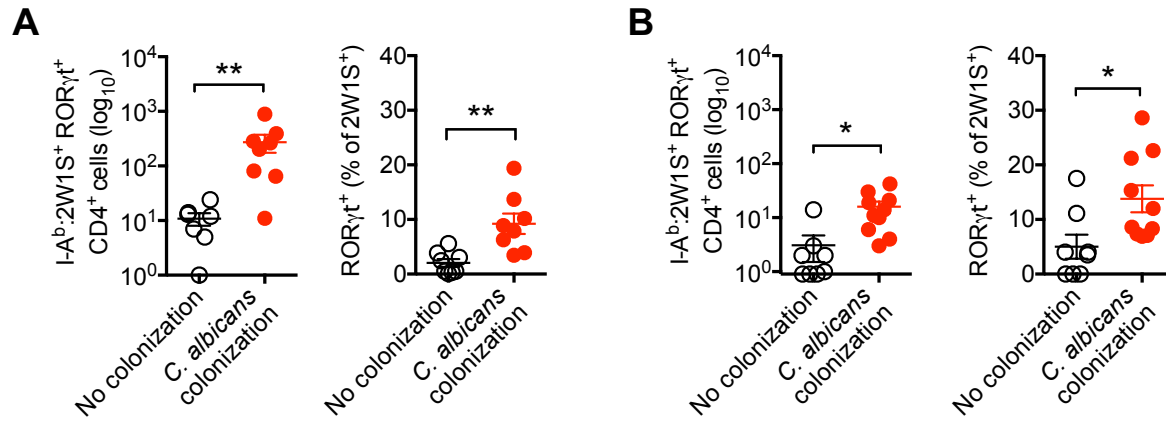

**Figure S4. Sustained expansion of *C. albicans* specific ROR $\gamma$ t<sup>+</sup> CD4<sup>+</sup> T cells with antigen-restimulation after intravenous *C. albicans* challenge, Related to Figure 3**

(A) Number and percent ROR $\gamma$ t<sup>+</sup> among I-A<sup>b</sup>:2W1S positive CD4<sup>+</sup> T cells amongst splenocyte and peripheral lymph node cells five days after intravenous infection ( $5 \times 10^4$  CFUs recombinant *C. albicans*) for mice colonized with recombinant *C. albicans* or no colonization control mice.

(B) Total number and percent ROR $\gamma$ t<sup>+</sup> among I-A<sup>b</sup>:2W1S positive CD4<sup>+</sup> T cells recovered from the kidney for the mice described in (A).

\* $p < 0.05$ , \*\*  $p < 0.01$ , Bar, mean  $\pm$  SEM.

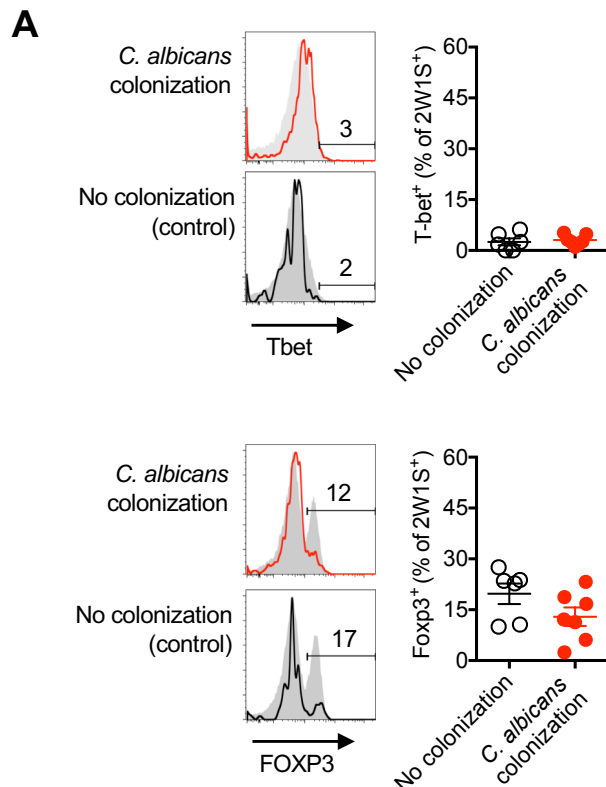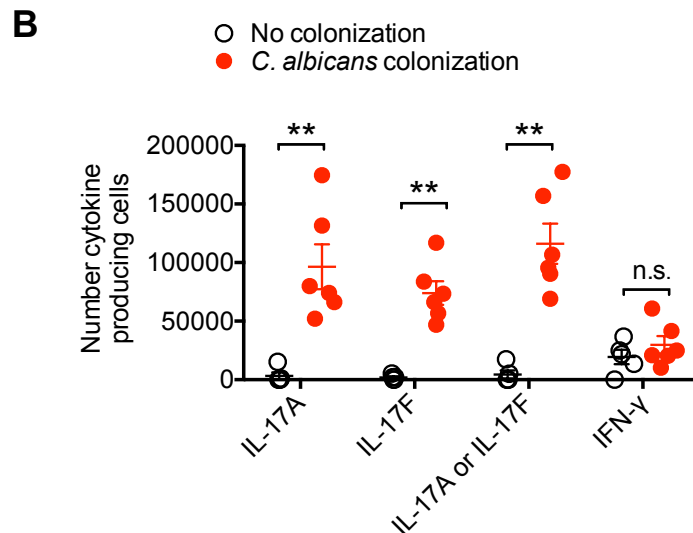

**Figure S5. Selective systemic expansion of ROR $\gamma$ t expressing CD4<sup>+</sup> T cells with commensal *C. albicans* specificity, Related to Figure 3**

(A) Representative plots and composite data showing percent Tbet<sup>+</sup> and FOXP3<sup>+</sup> among CD4<sup>+</sup> T cells with I-A<sup>b</sup>:2W1S specificity (solid line) or compared with bulk CD4<sup>+</sup> T cells (gray shaded) for cells from the spleen and peripheral lymph nodes 10 days after intestinal colonization with 2W1S-expressing recombinant *C. albicans* compared with no colonization controls.

(B) Number of CD4<sup>+</sup> T cells producing each cytokine after stimulation with non-recombinant heat killed *C. albicans* amongst spleen and peripheral lymph node cells for the mice described in (A).

\*\* $p < 0.01$ ; n.s., not significant; Bar, mean  $\pm$  SEM.

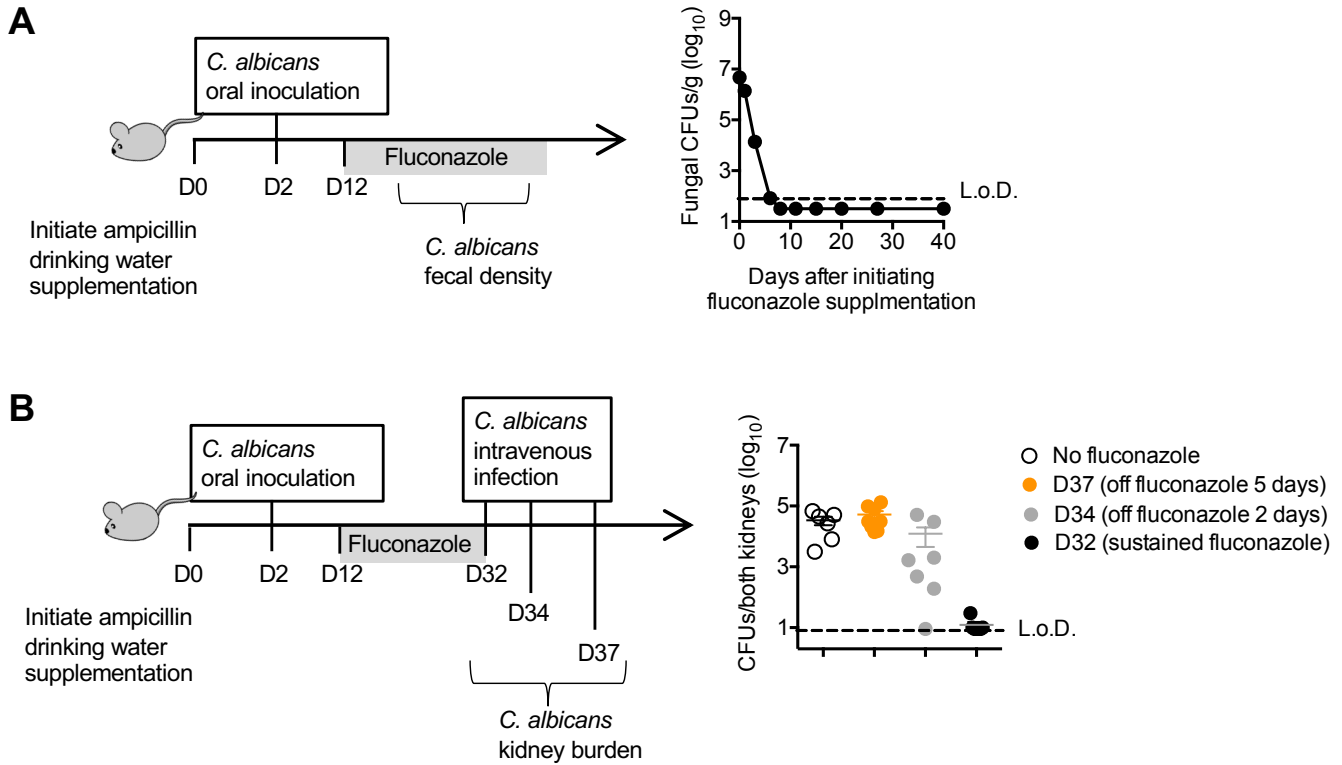

**Figure S6. Fluconazole eradicates *C. albicans* intestinal colonization, Related to Figure 5**

(A) Recoverable *C. albicans* from the feces of mice each day after initiating fluconazole to the ampicillin supplemented drinking water.

(B) Recoverable *C. albicans* 5 days after *C. albicans* intravenous infection ( $5 \times 10^4$  CFUs) at each time point after discontinuation of fluconazole, compared with mice with sustained fluconazole drinking water supplementation or no fluconazole treatment controls.

Bar, mean  $\pm$  SEM; L.o.D., limit of detection.

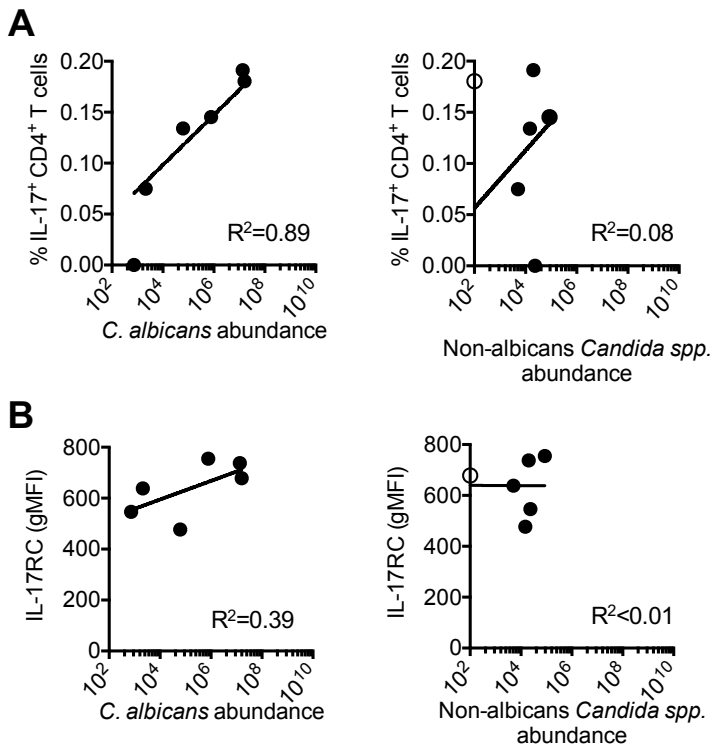

**Figure S7. *C. albicans* fecal colonization absolute density in humans positively correlates with systemic levels of fungal-specific Th17 inflammation, Related to Figure 7**  
 (A) Regression analysis comparing IL-17A or IL-17F production by CD4<sup>+</sup> peripheral blood cells of after heat-killed *C. albicans* stimulation compared with the fecal absolute abundance of *C. albicans* or non-albicans *Candida spp.* for each individual determined by shotgun sequencing.  
 (B) Regression analysis comparing intensity of IL-17RC staining by CD15<sup>+</sup>CD16<sup>+</sup> neutrophils amongst peripheral blood cells compared with the fecal absolute abundance of *C. albicans* or non-albicans *Candida spp.* for each individual determined by shotgun sequencing.  
 Levels below the limits of detection are shown as open circles on the y-axis.
